# Supplementary material
Source: PubMed Central journal article supplement (PMC3811331)
Supplement: EC.00163-13_zek999094167so1.pdf [file EC.00163-13_zek999094167so1.pdf]

## Supplemental Material Legend

**Movie S1.** Movie shows capsule and cell body enlargement of 10 individual H99 *C. neoformans* yeast cells, previously coated with the mAb 13F1 (IgM). The movie expands a total of 400 minutes; images were collected every 5 minutes. Video acceleration is 7 frames/second. Scale bar: 10 $\mu$ m.
